# Supplementary material for: BUB1 and SURVIVIN proteins are not degraded after a prolonged mitosis and accumulate in the nuclei of HCT116 cells
Source: PubMed Central journal article supplement (PMC5081682; doi:10.1038/cddiscovery.2016.79), 2016-10-24

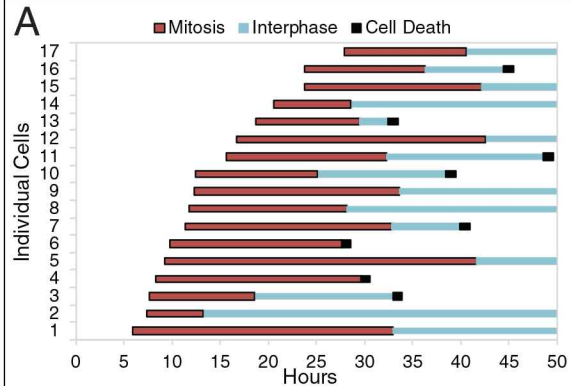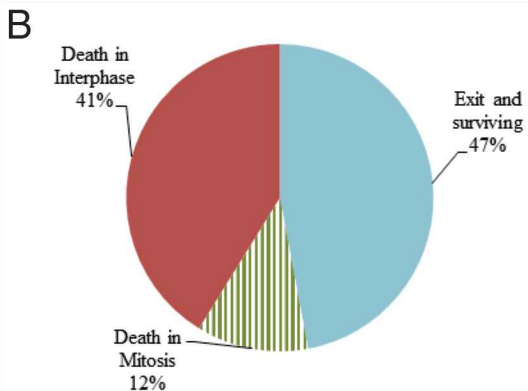

Supplement: cddiscovery201679-s4.pdf [file cddiscovery201679-s4.pdf]
